# Supplementary material
Source: Research Square preprint supplement (doi:10.21203/rs.3.rs-9195901/v1)
Supplement: Supplementary file 1 [file d8e5d18770dca95370770101.pdf]

|                  |                            |
|------------------|----------------------------|
| CPU              | Intel Xeon Platinum 8480+  |
| Total Cores      | 112 (56 cores 2.0 GHz x 2) |
| Peak Performance | 7.17 TFlops                |
| Memory Capacity  | 512 GiB                    |
| Memory Bandwidth | 614 GB/sec (DDR5)          |
